# Supplementary material for: Small cell transformation of ROS1 fusion-positive lung cancer resistant to ROS1 inhibition
Source: PubMed Central journal article supplement (PMC7400592; doi:10.1038/s41698-020-0127-9), 2020-08-03
Supplement: 41698_2020_127_MOESM1_ESM.pdf [file 41698_2020_127_MOESM1_ESM.pdf]

# Supplementary Figure 1

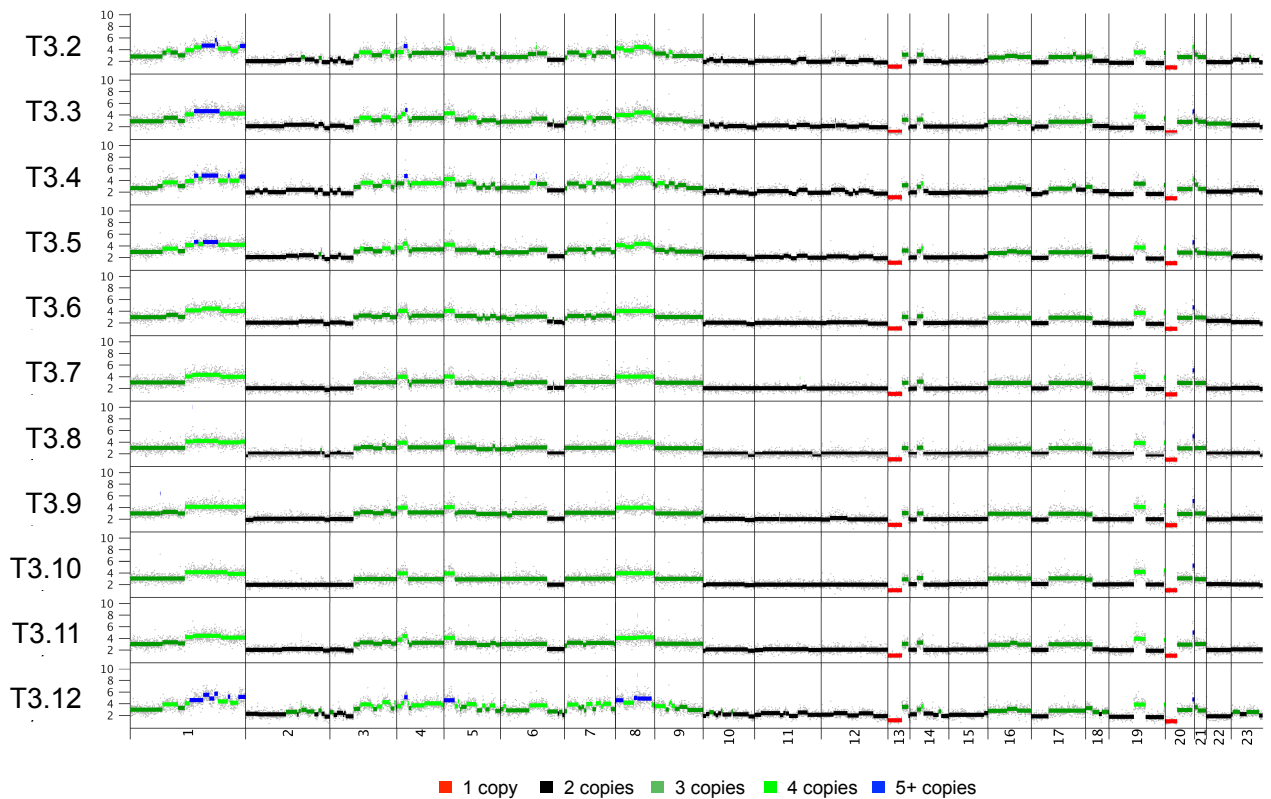

**Supplementary Figure 1. Copy number landscape across the metastatic autopsy samples.** Copy number profiles computed using SNP-based segmentation demonstrate low levels of heterogeneity across the autopsy specimens. Vertical lines segregate each chromosome, and different colors correspond to distinct copy numbers.

## Supplementary Figure 2

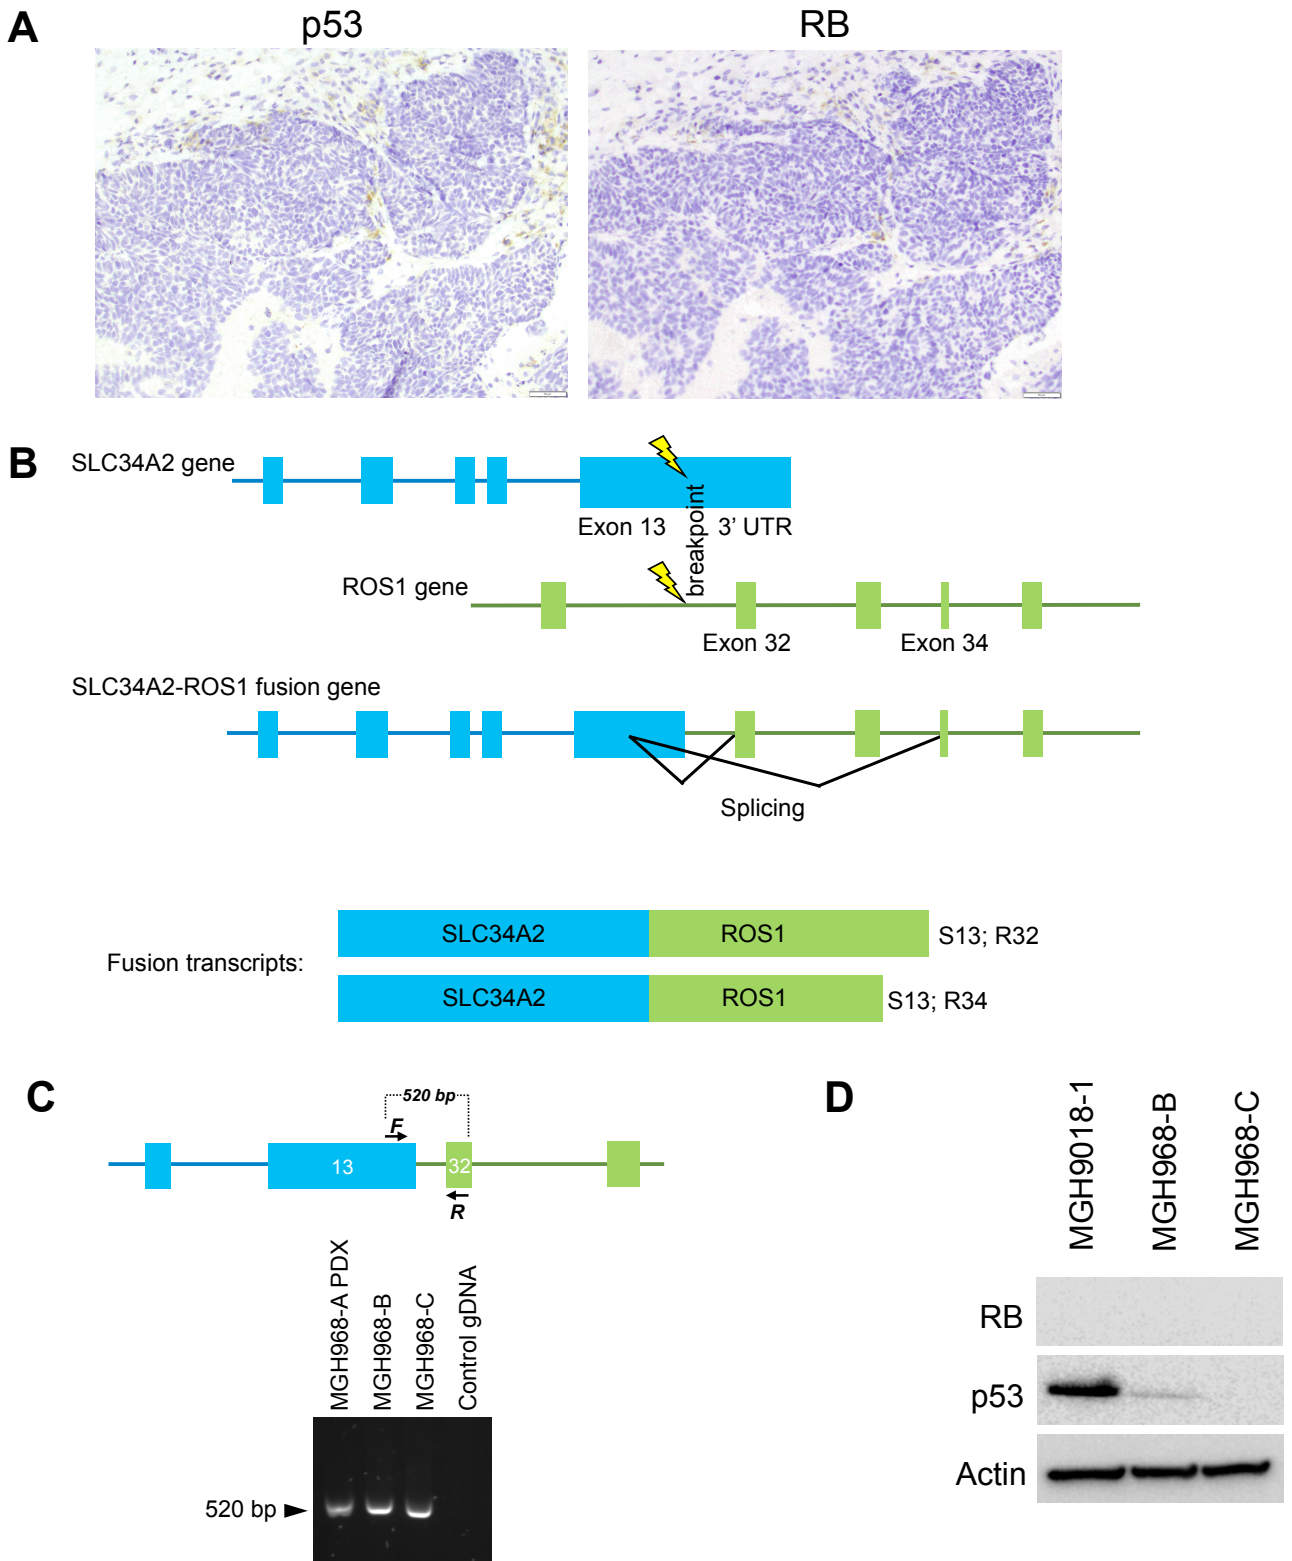

**Supplementary Figure 2. Characterization of patient-derived experimental models.** (A) A primary patient-derived xenograft (PDX) mouse model MGH968-A generated from an autopsy sample (T3.10) with small cell morphology and loss of TP53 and RB1 expression. (B) Schematic representing the *SLC34A2-ROS1* gene rearrangement and resulting mRNA fusion transcripts. (C) PCR assay confirms *SLC34A2-ROS1* fusion in the genomic DNA. (D) Loss of RB1 and TP53 expression in MGH968-B and MGH968-C cell lines.

## Supplementary Figure 3

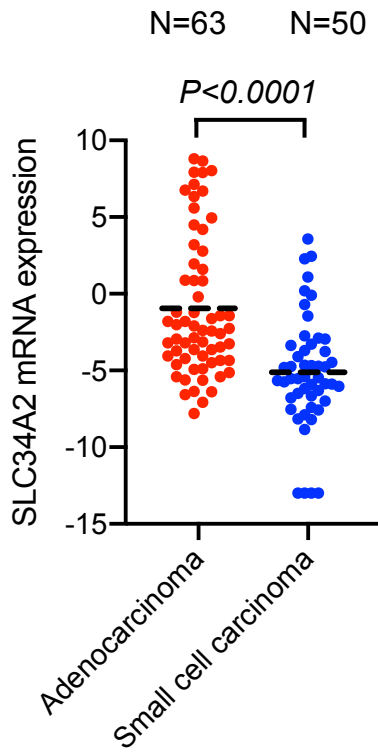

**Supplementary Figure 3. Comparison of mRNA expression of SLC34A2 in adenocarcinoma (red, n=63) and small cell carcinoma (blue, n=50) lung cancer cell lines.** The RNAseq dataset of cancer cell line encyclopedia (CCLE) was obtained from the CCLE portal (<https://portals.broadinstitute.org/ccle>). The dotted lines indicate the means and two-sided t-test was performed between two groups.
